# Supplementary material for: Resident perception of volcanic hazards and evacuation procedures
Source: Copernicus journal article supplement (doi:10.5194/nhess-9-251-2009), 2009-02-27
Supplement: Supplementary file 1 [file nhess-9-251-2009-supplement.pdf]

Survey Questionnaire - Public perception in south Iceland: Katla, jökulhlaup hazard and the evacuation plan

Section 1 - Classification questions:

1. Age:
  - 18-30
  - 31-50
  - 50+
  
2. How far from the river do you live?
  - 0-2 km
  - 2-5 km
  - 5-10 km
  - 10+ km
  
3. How long have you lived at this address? \_\_\_\_\_
  
4. For how many generations has your family lived in this region? \_\_\_\_\_
  
5. How many people live/stay at this address? Adults: \_\_\_\_\_ Children: \_\_\_\_\_
  
6. In which country have you lived the longest? \_\_\_\_\_
  
7. What language do you usually speak at home? \_\_\_\_\_
  
8. What is the highest level of education you have completed?
  - Some schooling
  - Educated from 6 to 16 years
  - High school 16-20 years
  - Special education
  - University Degree
  - Postgraduate Qualification
  - Other, please specify: \_\_\_\_\_
  
9. What is your occupation? \_\_\_\_\_

Section 2 - Knowledge and perception questions of Katla, jökulhlaup hazards and the warning system:

10. Can you tell me a brief eruptive history of Katla?

---

---

---

11. How would you define a jökulhlaup?

---

---

12. What do you think can generate a jökulhlaup?

---

---

13. From the answers given in question 12 which one is the most likely to cause a jökulhlaup along the Markarfljót?

---

---

14. Do you think the region where you live could be affected by a jökulhlaup?

- Yes       No       don't know

15. What local and distant geographic areas could generate a jökulhlaup along the Markarfljót?

---

---

16. Do you know when the last jökulhlaup affected the Markarfljót?

- Yes       No

If yes, when? \_\_\_\_\_

17. Do you think a jökulhlaup affecting the Markarfljót region could have any of the following effects? (You may choose as many as you like).

Human Impacts:

- Death and injury of people
- Damage and destruction to homes and businesses
- Damage and destruction to critical lifelines e.g. water, electricity
- Damage and destruction to communication networks and infrastructure
- Damage and destruction to transport networks and infrastructure
- Impacts on agriculture
- Impacts on tourism
- Other, please specify:

---

---

Biophysical Impacts:

- Impacts on river systems
- Impacts on beaches
- Impact on agricultural land
- Impacts on submarine plants and animals
- Impacts on natural plants and animals
- Other, please specify:

---

---

18. Which of the above do you think will have the greatest impact on the Markarfljót region and why?

---

---

---

19. Do you know whether a jökulhlaup warning system exists for the Markarfljót region?

Yes

No

Don't know

20. If you answered yes to question 19 did you know prior to this evacuation exercise?

Yes

No

21. If you answered no or don't know to question 19 do you think the Markarfljót region needs an early warning system?

Yes

No

22. Are you aware of the emergency procedures you need to follow if a jökulhlaup warning is issued?

Yes

No

23. If you answered yes to question 22 did you know prior to this evacuation exercise?

Yes

No

24. Please describe what you would do if a jökulhlaup warning is issued.

---

---

---

---

25. What would you do if there was a volcanic eruption in Katla i.e. how would you find out if you need to evacuate?

---

---

---

---

26. Who do you think is responsible for issuing a jökulhlaup warning for the Markarfljót region?

---

---

27. Who do you think is responsible for evacuation procedures if a jökulhlaup warning is given?

---

28. What would you define as the most serious hazard in your area if Katla were to erupt? You can mention more than one hazard, and if so please rank in order with 1 being the most serious.

- Jökulhlaup
- Ice blocks
- Lightning
- Tephra
- Poisonous gases
- Lava
- Tsunami
- Earthquake

Section 3 - Attendance at and perception of the town meetings on Katla, the evacuation plan and exercise and use of hazard information available through various media sources:

29. In relation to the town meetings that were held on the possibility of another Katla eruption and the proposed evacuation plan, how many did you attend?

- None                      One                      Two                      Three  
Four

30. How informative were the meetings to you? Please explain.

- Very informative                      Informative                      Not informative
- 
- 

31. How many evacuation messages did you receive on the 26 March 2006?

- None                       One                       Two                       Three  
Phone Call

32. Do you always carry your GSM with you?                       Yes                       No

33. If yes, is it so you can be warned about a possible eruption in Katla?

- Yes                       No

34. Do you always have GSM coverage around your area?

Yes       No       Don't know

35. Have you registered your phone with the authorities?

Yes       No

36. Did you take part in the evacuation exercise? Why/why not?

Yes       No

---

---

37. Were you, or anyone else you know, reluctant to take part in the exercise? Why?

Yes       No

---

---

---

---

38. If you did take part in the evacuation exercise on Sunday 26 March how did you feel about it? Please explain your answer.

Positive       Negative       Mixed

---

---

---

39. How long did it take you to evacuate?

< 30 minutes       30 < 60 minutes       60 < 90 minutes       > 90 minutes

40. Do you think 30 minutes is enough time to complete the list and evacuate?

Yes       No

41. Would you prefer to have a pre-warning even if they are not sure whether an eruption and jökulhlaup are imminent?

Yes       No

42. Do you think the evacuation procedure is appropriate?       Yes       No

43. Would you follow this procedure if there was a real evacuation? Please explain.

Yes       No       Don't know

---

---

---

44. Would you follow a different procedure if it was night/day, winter/summer or good/bad weather conditions? Please explain.

Yes

No

Don't know

---

---

---

45. How do you feel about leaving your animals?

Very concerned

A little concerned

Not concerned

Not Applicable

46. Do you think it is necessary to have another evacuation exercise following any changes to the evacuation plan?

Yes

No

Don't know

47. How often do you think they should practice evacuations in this region?

Once every 6 months

Once every year

Once every two years

Once every five years

Other, please specify: \_\_\_\_\_

48. Have you looked up the emergency services website (Almannavarnir) and familiarised yourself with information on the possible natural hazards connected to a Katla eruption?

Yes

No

49. Have you ever used the Skjálftavefsjá website for hazard information? If yes, how often?

Yes

No

---

50. Have you ever used the Veðurstofa website for hazard information? If yes, how often?

Yes

No

---

51. Have you followed discussions in the media about natural hazards connected to a Katla eruption?

Yes

No

52. From what forms of media do you access this information?

Newspaper

Radio

Television

Internet

Information Brochures

Books
